# Supplementary material for: Influence of droplet drying configuration on surface-enhanced Raman scattering performance
Source: Royal Society of Chemistry journal article supplement (doi:10.1039/c3ra42838a), 2013-01-01
Supplement: c3ra42838a.pdf [file c3ra42838a.pdf]

## Supplementary Information

### Influence of Droplet Drying Configuration on Surface-enhanced Raman Scattering Performance

Ertug Avci and Mustafa Culha\*

*Department of Genetics and Bioengineering, Faculty of Engineering and Architecture, Yeditepe University, Istanbul 34755, Turkey*

Figure S1 shows the photographs of sessile droplets on  $\text{CaF}_2$  and PDMS surfaces. Contact angle of  $\text{CaF}_2$  surface is measured as  $90^\circ$  and of PDMS surface as  $95^\circ$  demonstrating similar hydrophobicity of two surfaces.

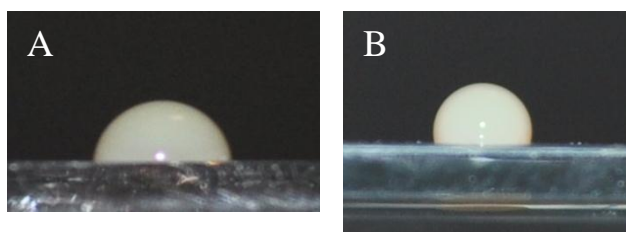

**Fig. S1** The photographs of sessile droplets on  $\text{CaF}_2$  (A) and PDMS (B) surfaces.

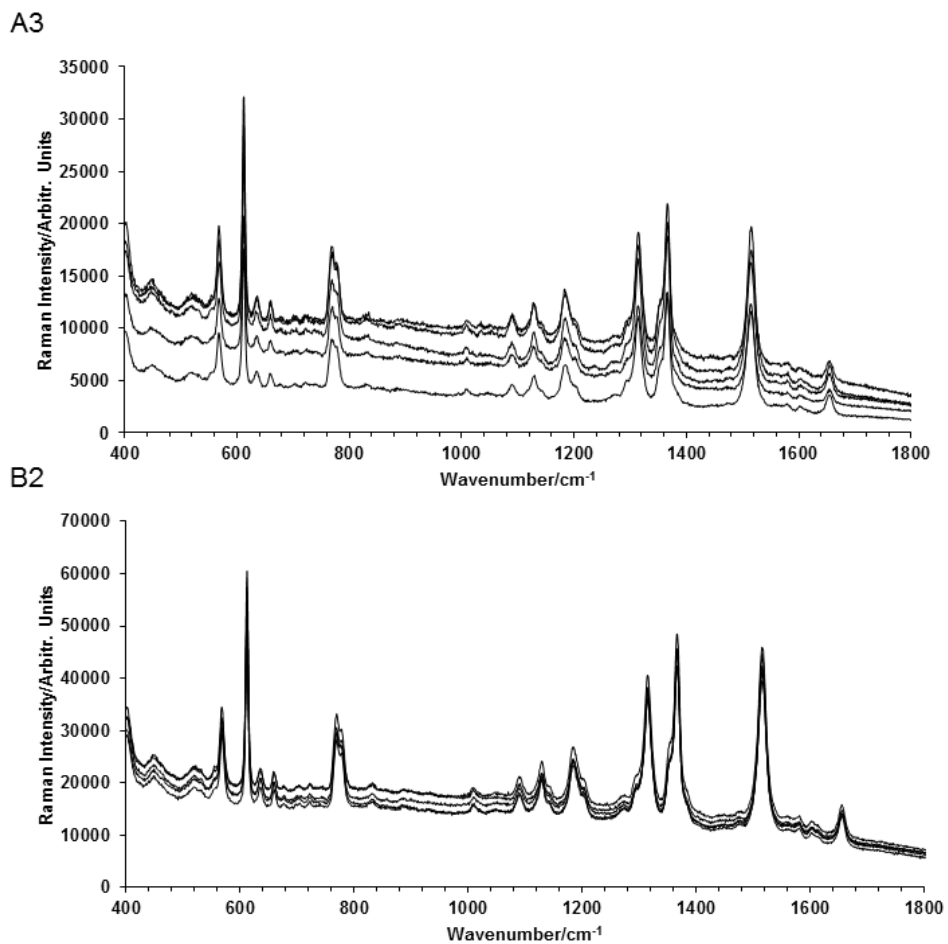

**Figure S2.** Spectra of rhodamine 6G acquired from A3 region of sessile droplet, and B2 region of suspended droplet.

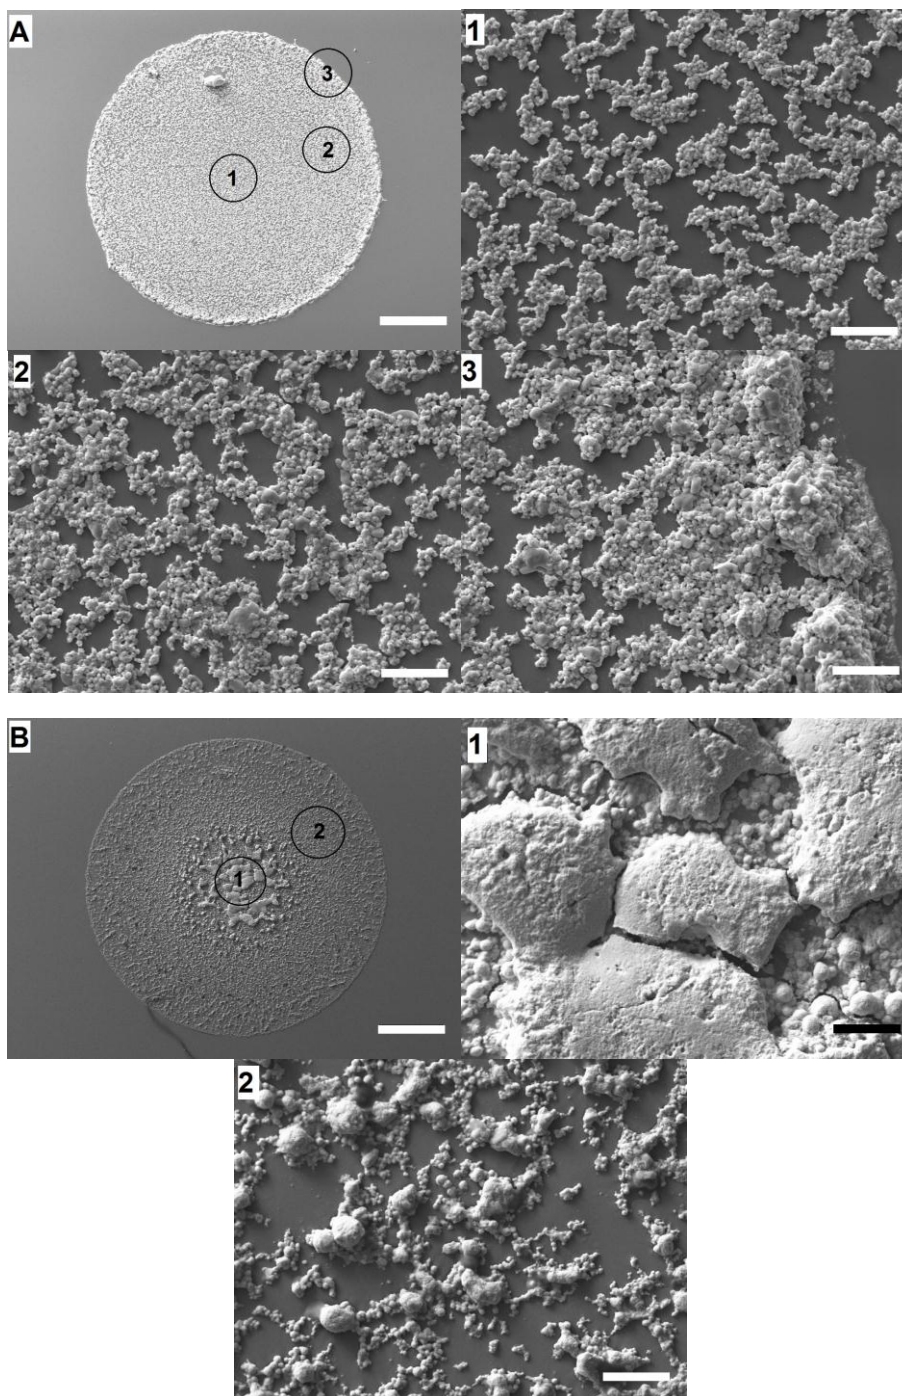

**Fig. S3** SEM images of Ag-R6G deposited area for sessile (A) and suspended (B) droplets and higher magnification images of the encircled regions for each droplet type. Scale bar for whole droplets (A and B) is 200 $\mu$ m and for higher magnification images is 10 $\mu$ m.

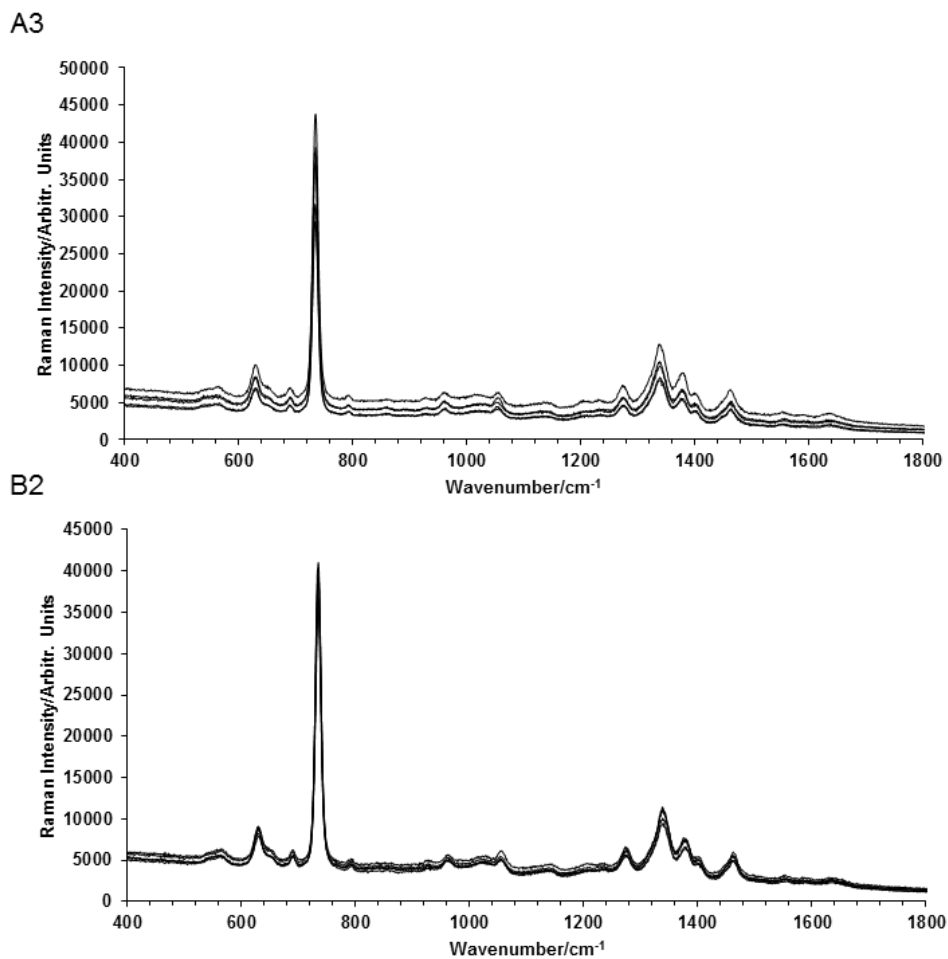

**Figure S4.** Spectra of adenine acquired from A3 region of sessile droplet, and B2 region of suspended droplet.

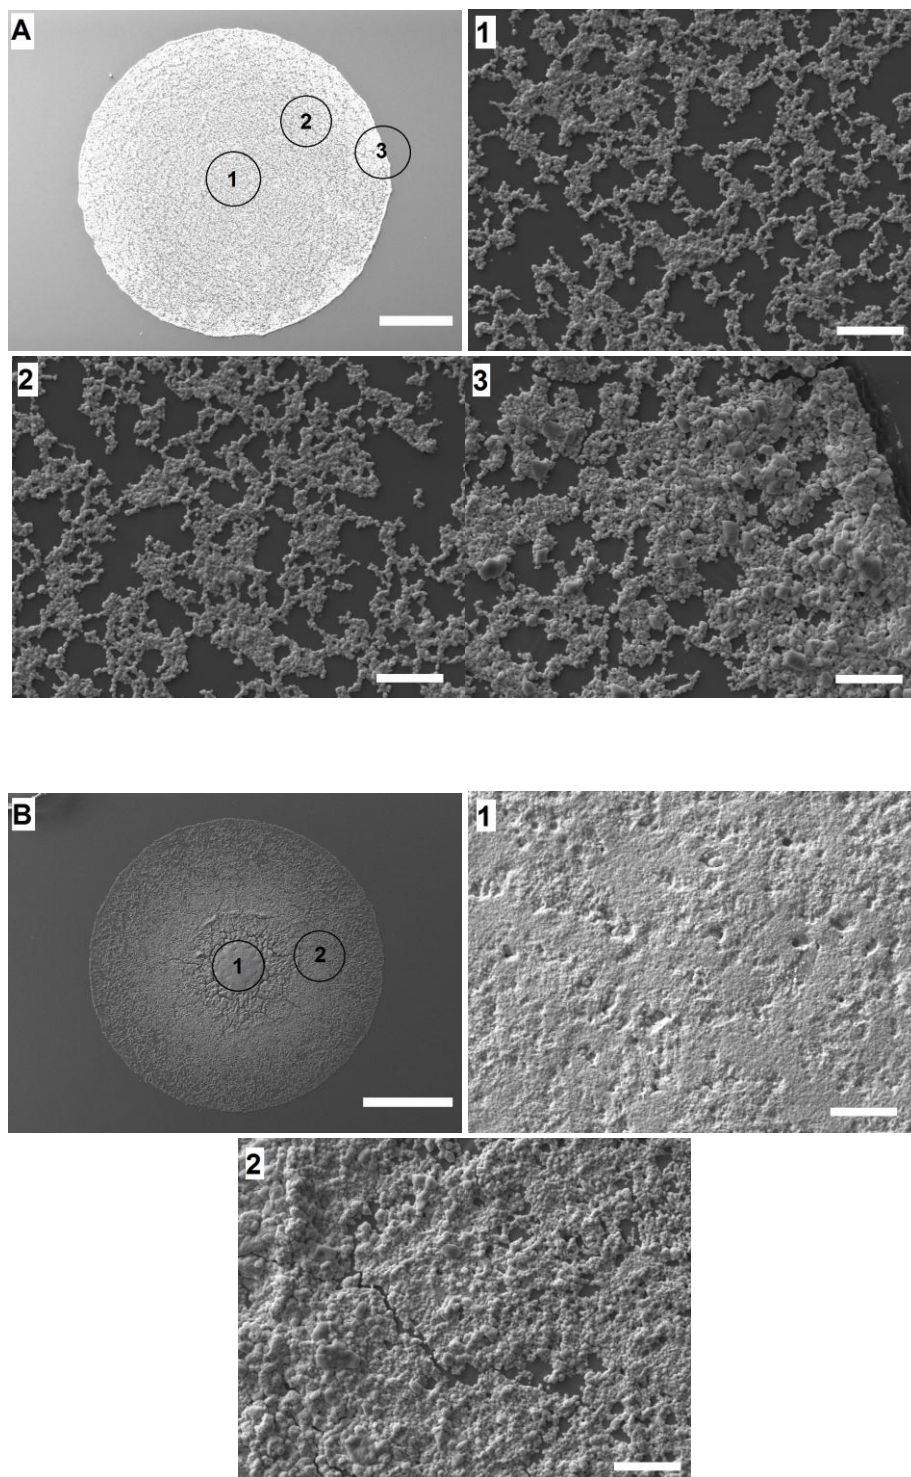

**Fig. S5** SEM images of Ag-adenine deposited area for sessile (A) and suspended (B) droplets and higher magnification images of the encircled regions for each droplet type. Scale bar for whole droplets (A and B) is 200 μm and for higher magnification images is 10 μm.



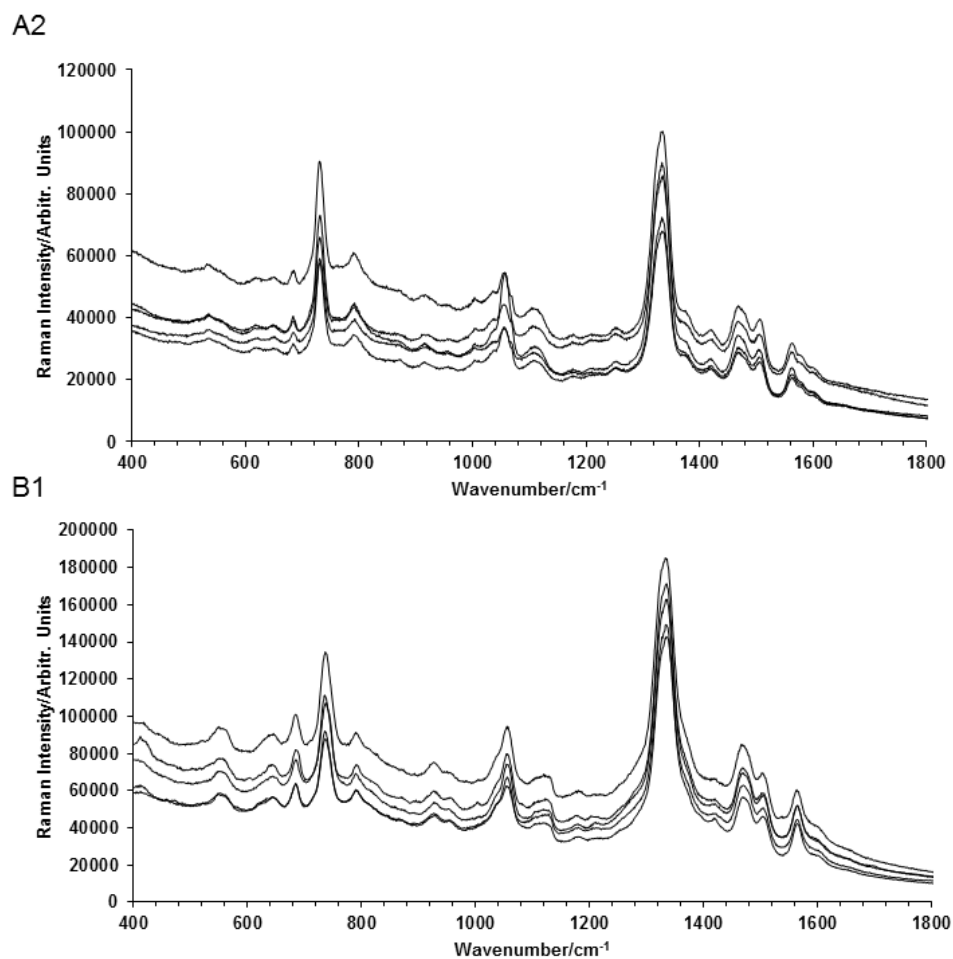

**Figure S6.** Spectra of 10-base polyadenine oligonucleotide acquired from A2 region of sessile droplet, and B1 region of suspended droplet.

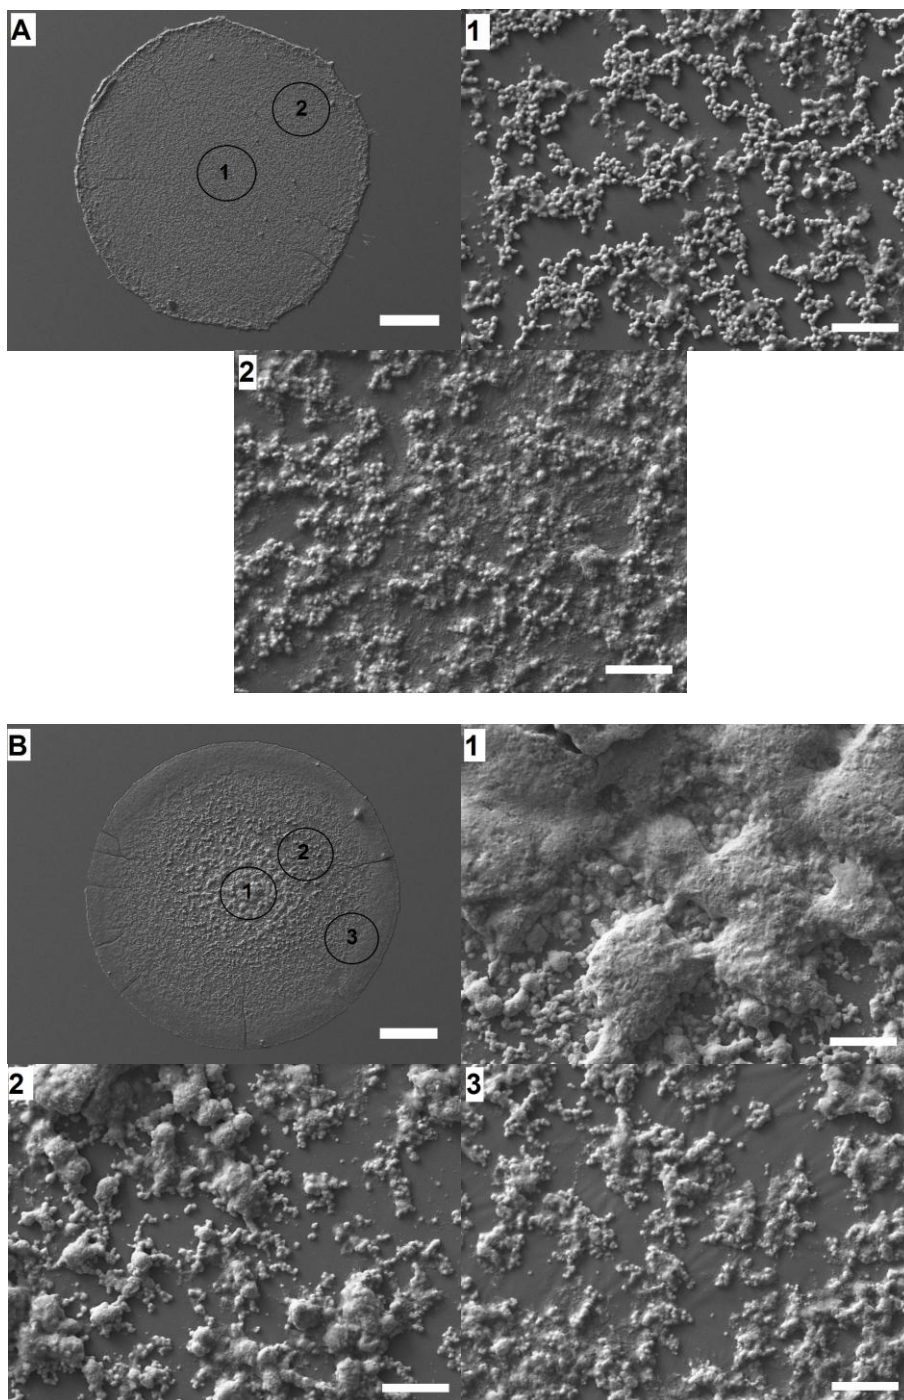

**Fig. S7** SEM images of Ag-10 base polyA oligonucleotide deposited area for sessile (A) and suspended (B) droplets and higher magnification images of the encircled regions for each droplet type. Scale bar for whole droplets (A and B) is 200 $\mu$ m and for higher magnification images is 10 $\mu$ m.

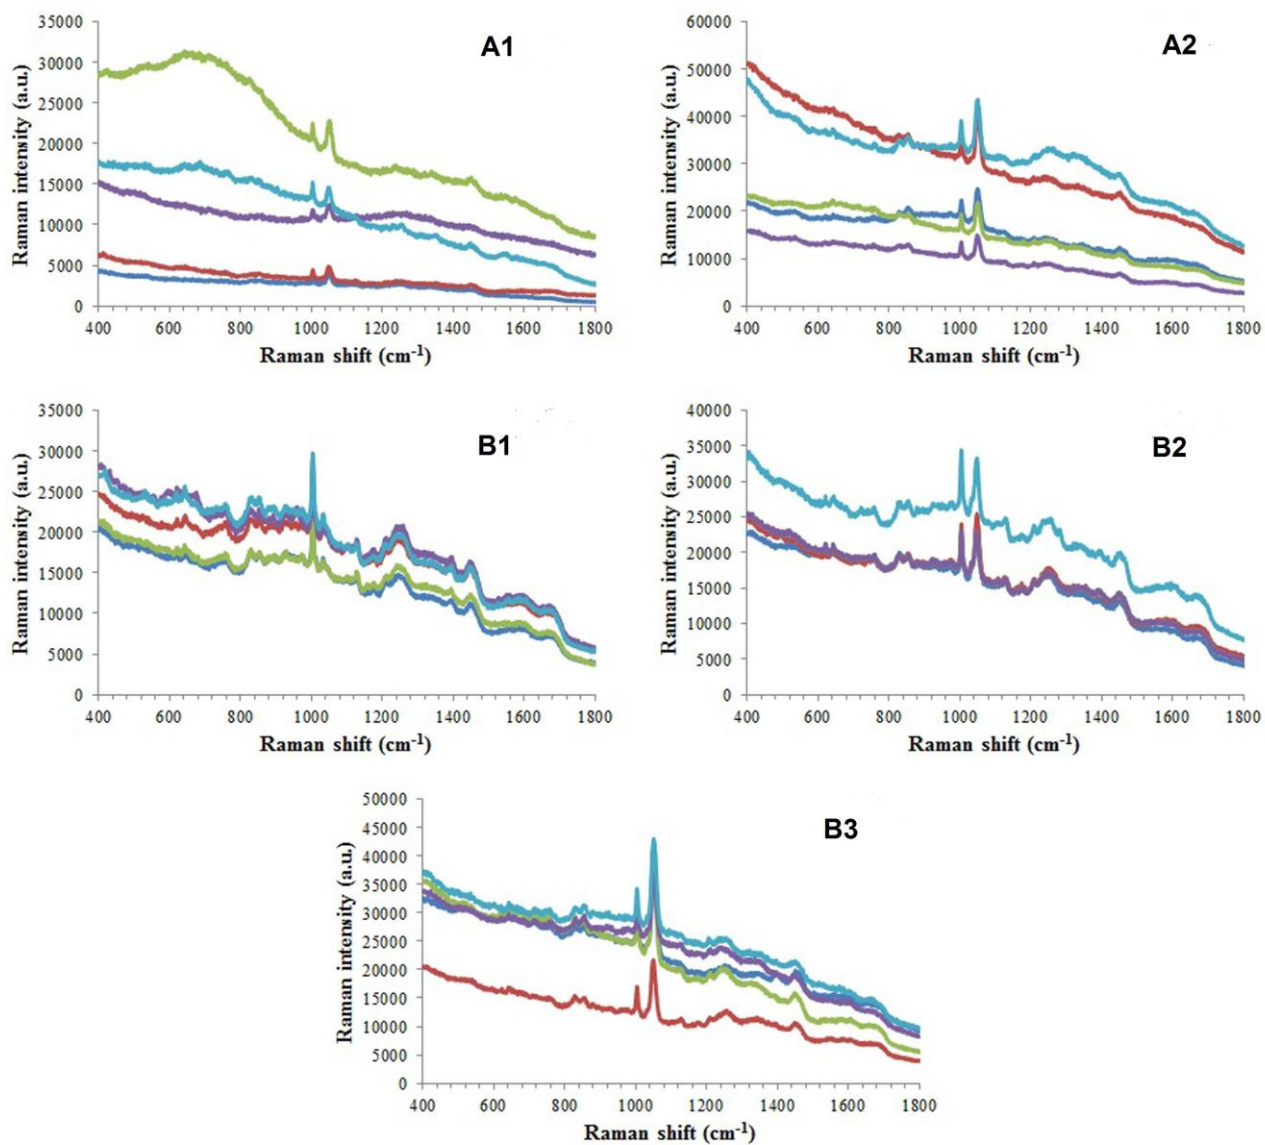

**Figure S8.** Spectra of catalase acquired from regions of sessile and suspended droplets.



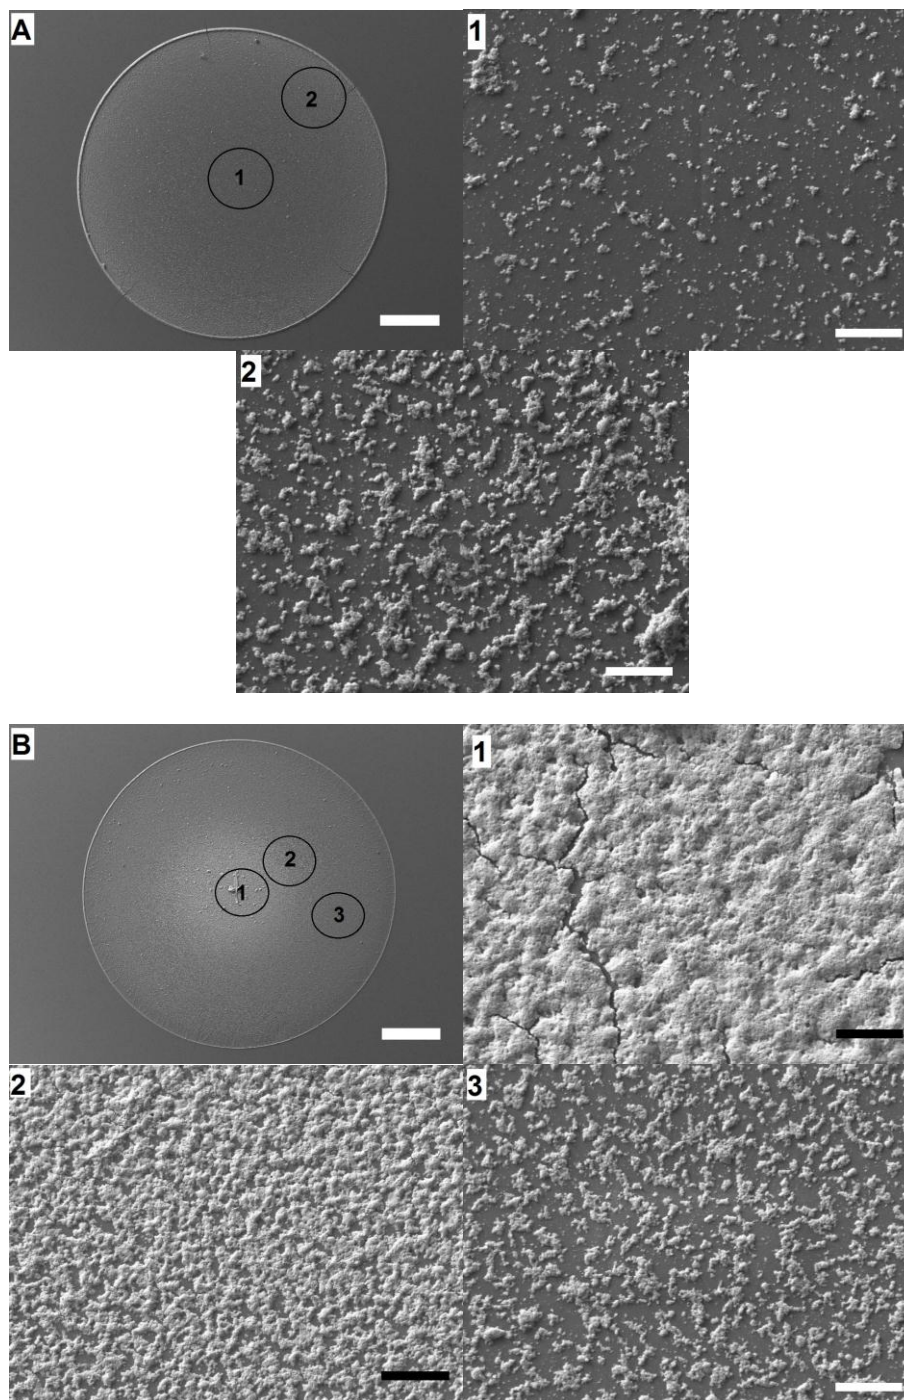

**Fig. S9** SEM images of Ag-catalase deposited area for sessile (A) and suspended (B) droplets and higher magnification images of the encircled regions for each droplet type. Scale bar for whole droplets (A and B) is 200 $\mu$ m and for higher magnification images is 10 $\mu$ m.
